# Supplementary material
Source: publisher site journal article supplement (https://www.spandidos-publications.com/4280/downloadSupplementary)

Figure S1. Symbol plots depicting the V genes with (A) >2-fold increase or (B) >2-fold decrease in clonal frequency post-RT vs. pre-RT for the indicated patients. The threshold was randomly set at 2-fold change. The number of V genes with more than 2-fold change per patient is shown in green. RT, radiation therapy.

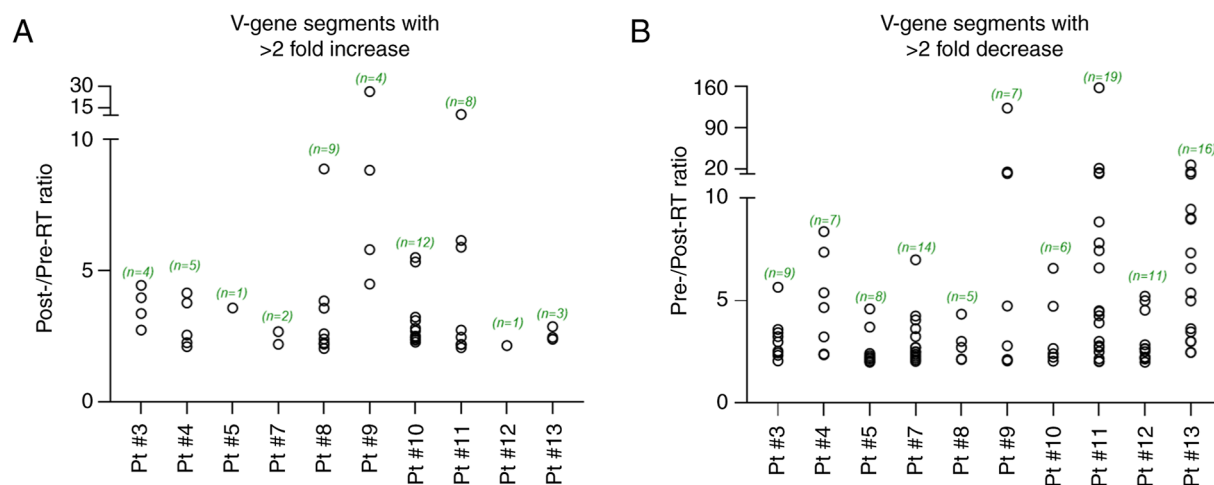

Supplement: Supplementary file 1 [file downloadSupplementary]
